# Supplementary material for: Sub-1 nm Pt nanoclusters on N and P co-doped carbon nanotubes for the electrocatalytic hydrogen evolution reaction
Source: Royal Society of Chemistry journal article supplement (doi:10.1039/d2ta05241e), 2022-01-01
Supplement: d2ta05241e1.pdf [file d2ta05241e1.pdf]

## Electronic Supplementary Information

### Sub-1 nm Pt nanoclusters on N and P co-doped carbon nanotubes for electrocatalytic hydrogen evolution reaction

Junxing Han,<sup>a,b,c,\*</sup> Chenhao Gong,<sup>a,b,c</sup> Can He,<sup>a,b,c</sup> Peiran He,<sup>a,b,c</sup> Jian Zhang<sup>a,b,c</sup> and Zhongguo Zhang<sup>a,b,c,\*</sup>

#### Experimental Section

**Chemicals and Materials:** HNO<sub>3</sub>, H<sub>2</sub>SO<sub>4</sub>, NaH<sub>2</sub>PO<sub>2</sub>·H<sub>2</sub>O, melamine, H<sub>2</sub>PtCl<sub>6</sub> and H<sub>2</sub>IrCl<sub>6</sub> are purchased from local suppliers. Carbon nanotubes used in this study were supplied by Nanotech Port Co. Ltd. (Shenzhen, China) with a purity of 97%. All water used in this work was purified using a Milli-Q water purification system which provides a resistance of 18.2 MΩ at 25 °C. All chemicals were used as received without any further treatment.

**Synthesis of Pt/NP-CNTs:** In a typical synthesis, 1.5 g of raw carbon nanotubes (CNTs) was treated with 40 mL mixed acid solution (HNO<sub>3</sub> : H<sub>2</sub>SO<sub>4</sub> = 1:3) in an ultrasonic water bath for 2 h to remove most of impurities. After filtration, washing and drying at 60 °C, the as-prepared O-CNTs was sufficiently mixed with melamine (2 g) by grinding for 30 min and thermally treated at 750 °C for 3 h in Ar with a heating rate of 5 °C min<sup>-1</sup>. The as-prepared sample was denoted as N-CNTs. Then, the obtained N-CNTs (0.5 g) was ground with NaH<sub>2</sub>PO<sub>2</sub>·H<sub>2</sub>O (5 g) for 30 min and heated at 300 °C for 2 h in Ar with a heating rate of 5 °C min<sup>-1</sup> and cooled down to room temperature. After washing with water, filtering and drying at 60 °C, the obtained black powder was marked as NP-CNTs. To prepare Pt/NP-CNTs, 200 mg NP-CNTs was dispersed in 60 ml deionized water with sonication, transformed in an oil bath and heated to 70 °C under N<sub>2</sub> atmosphere. Then, 1 mL H<sub>2</sub>PtCl<sub>6</sub> solution (0.01 g mL<sup>-1</sup>) was injected into the aqueous solution and stirred at 70 °C for 5 h. After filtration and drying at 60

°C, the mixture was placed in a tube furnace and annealed at 300 °C for 2 h under Ar atmosphere. The synthesized sample was denoted as Pt/NP-CNTs.

**Synthesis of Ir/NP-CNTs:** The synthetic procedure of Ir/NP-CNTs is similar to that of Pt/NP-CNTs just by replacing  $\text{H}_2\text{PtCl}_6$  solution ( $0.01 \text{ g mL}^{-1}$ ) to  $\text{H}_2\text{IrCl}_6$  solution ( $0.01 \text{ g mL}^{-1}$ ).

**Characterization:** Scanning electron microscopy (SEM) was performed on a Nova-450 electron microscope. Transmission electron microscopy (TEM) images were taken on a JEOL JEM-2100F field emission electron microscope at 200 kV. X-ray photoelectron spectroscopy (XPS) was conducted on a ULVAC PHI Quantera spectrometer with the binding energy calibrated with C 1s at 284.6 eV. X-ray diffraction (XRD) patterns were collected on a X'Pert 3 X-ray powder diffractometer operating at 40 kV and 40 mA with monochromatized Cu K $\alpha$  radiation ( $\lambda=0.15418 \text{ nm}$ ). Raman spectra were recorded on a LabRam HR800 instrument with an excitation wavelength of 514.5 nm. The compositions of the catalysts were analyzed by inductively coupled plasma atomic emission spectrometry (ICP-AES, Thermo Fisher, USA).

**Electrochemical measurements:** HER performance tests were conducted on an Autolab electrochemical workstation (PGSTAT302N) with a 0.5 M  $\text{H}_2\text{SO}_4$  solution as the electrolyte. A conventional three-electrode system was used with the Pt/NP-CNTs on Ni foam ( $0.5 \text{ cm} \times 0.5 \text{ cm}$ ) as the working electrode, a glassy-carbon (GC) as the counter electrode and an Ag/AgCl (1 M KCl) electrode as the reference electrode. All potentials reported were calculated versus the reversible hydrogen electrode (RHE). Linear sweep voltammograms (LSV) and cyclic voltammetry (CV) tests were recorded at a scan rate of  $5 \text{ mV s}^{-1}$  at room temperature. Electrochemical impedance spectroscopy (EIS) was measured in a frequency range from 100 kHz to 0.1 Hz with an amplitude of 10 mV on an Autolab electrochemical workstation.

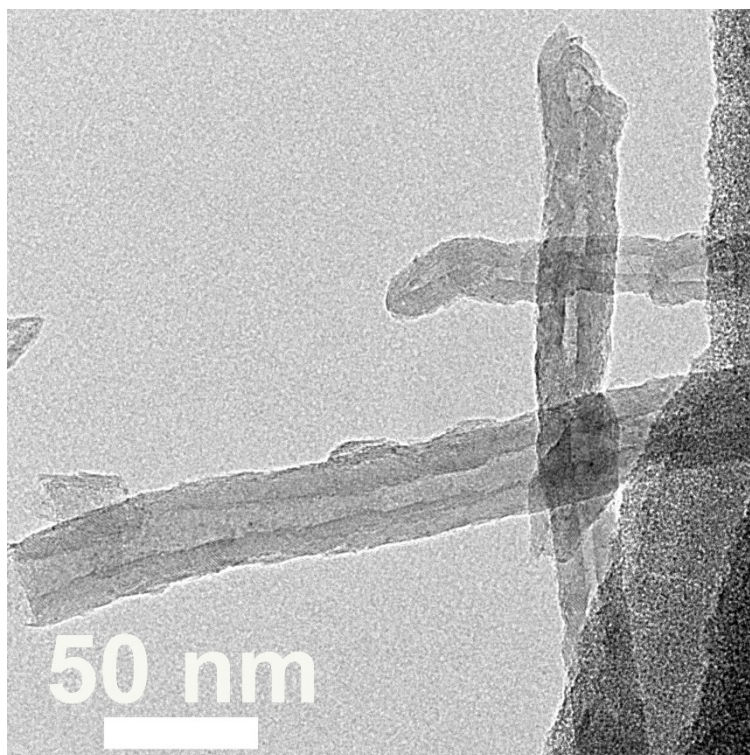

**Figure S1.** TEM image of O-CNTs.

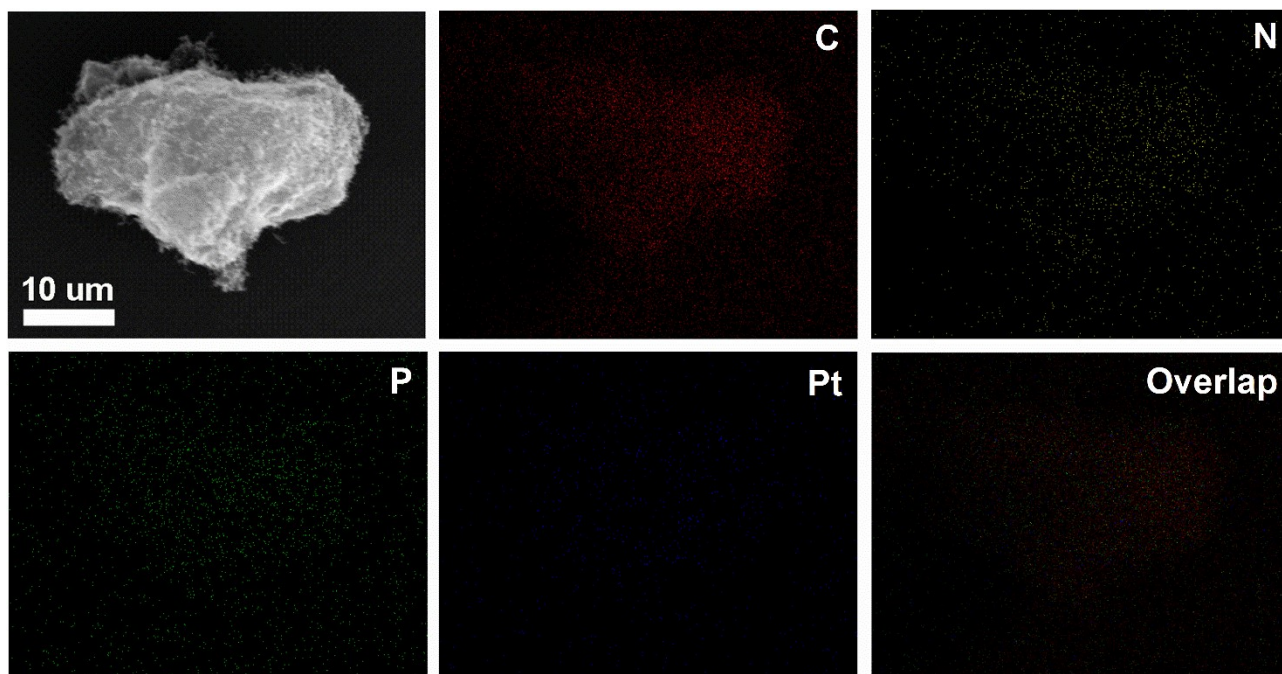

**Figure S2.** EDS mapping of Pt/NP-CNTs

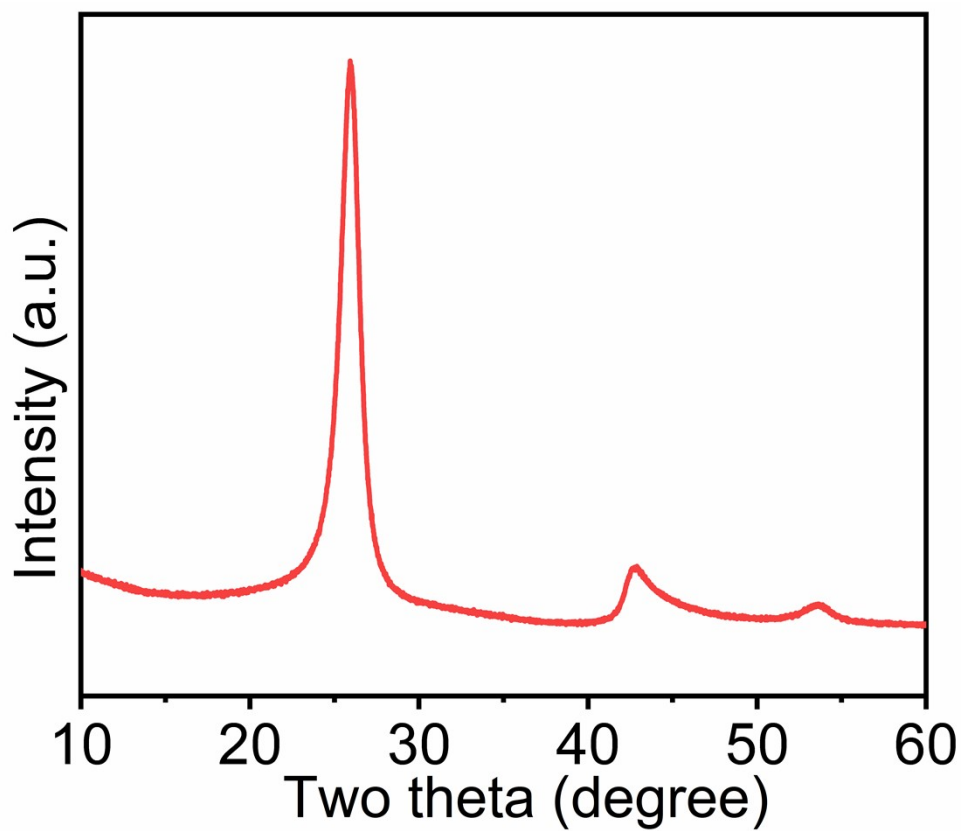

Figure S3. XRD pattern of Ir/NP-CNTs.

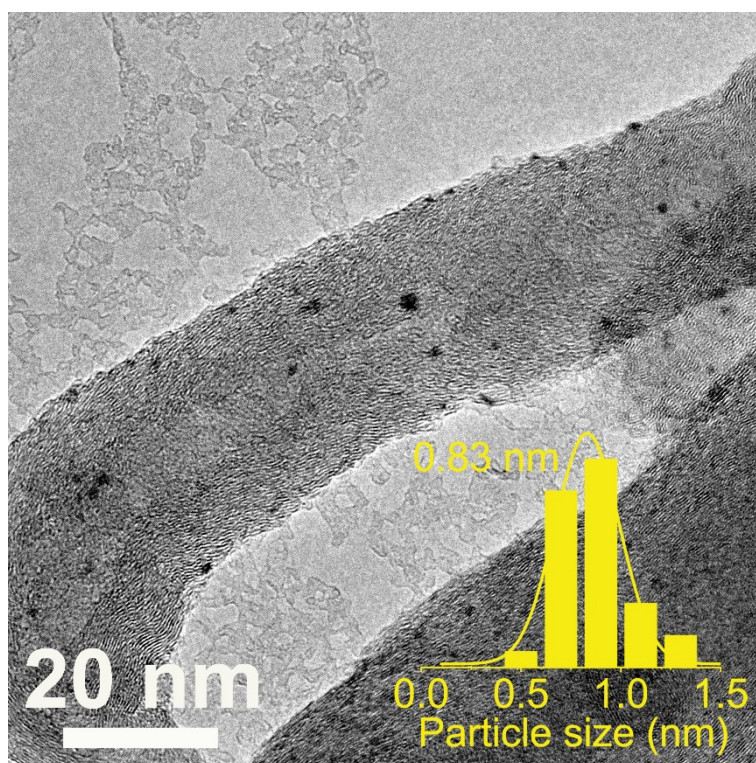

Figure S4. TEM image of Ir/NP-CNTs and corresponding Ir nanocluster size distribution (inset).

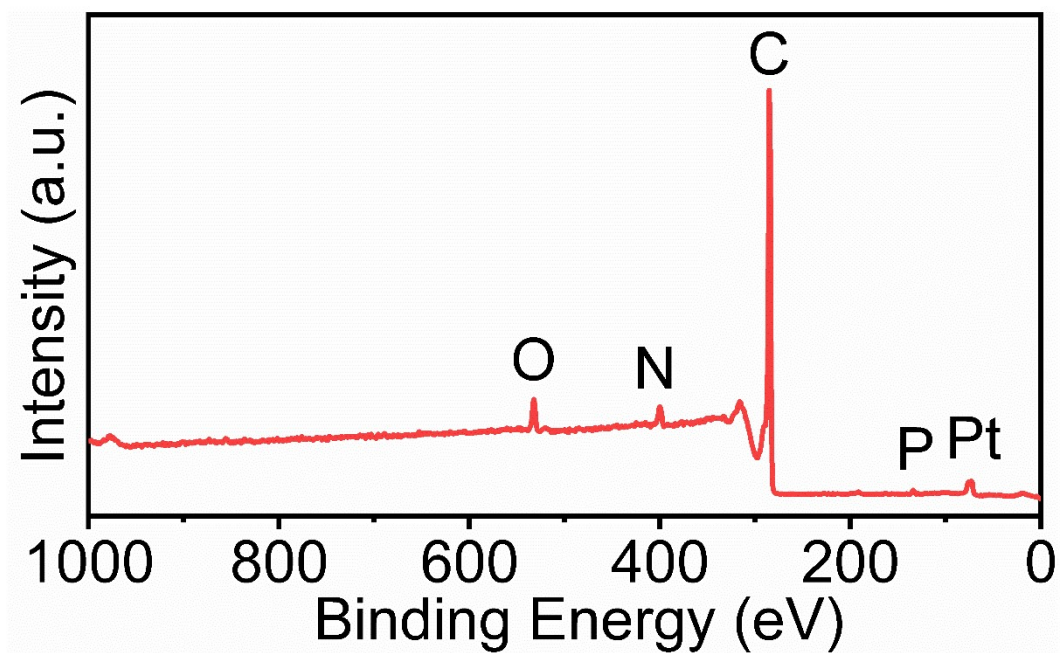

Figure S5. XPS survey spectrum of Pt/NP-CNTs.

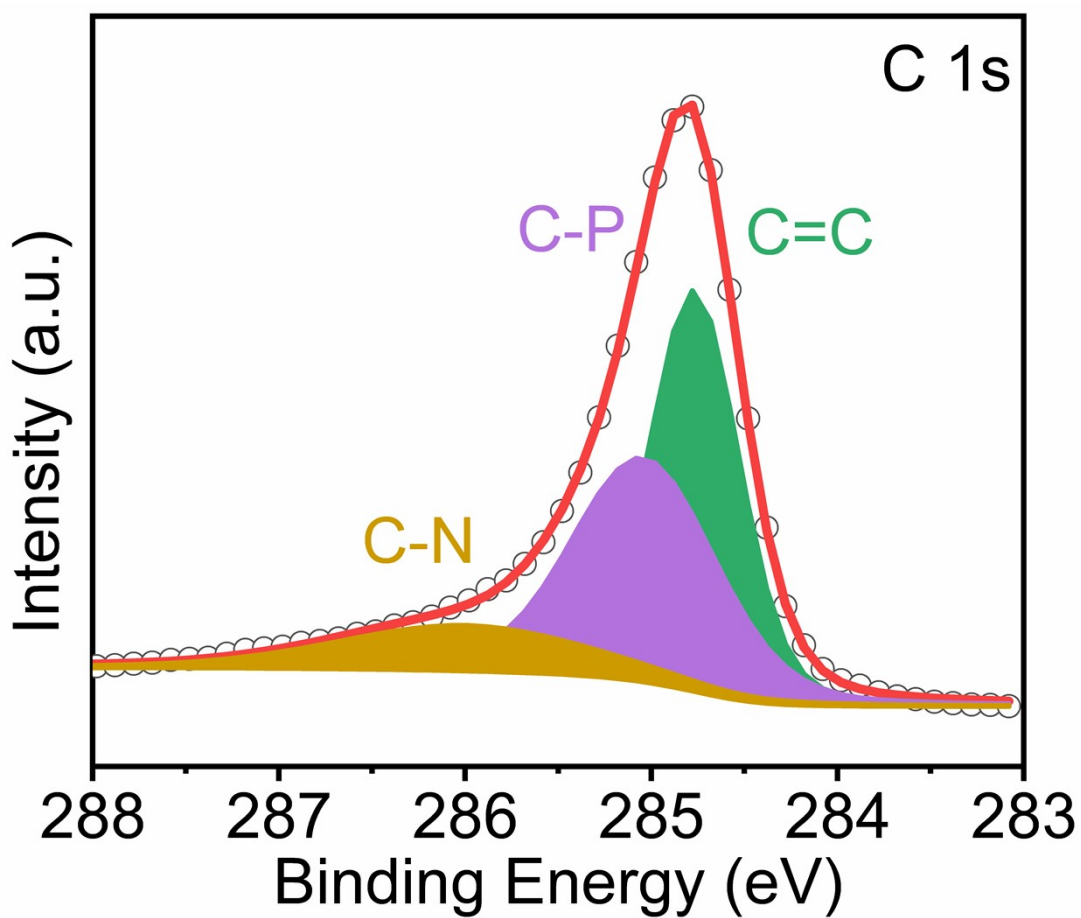

Figure S6. C 1s XPS spectrum of Pt/NP-CNTs.

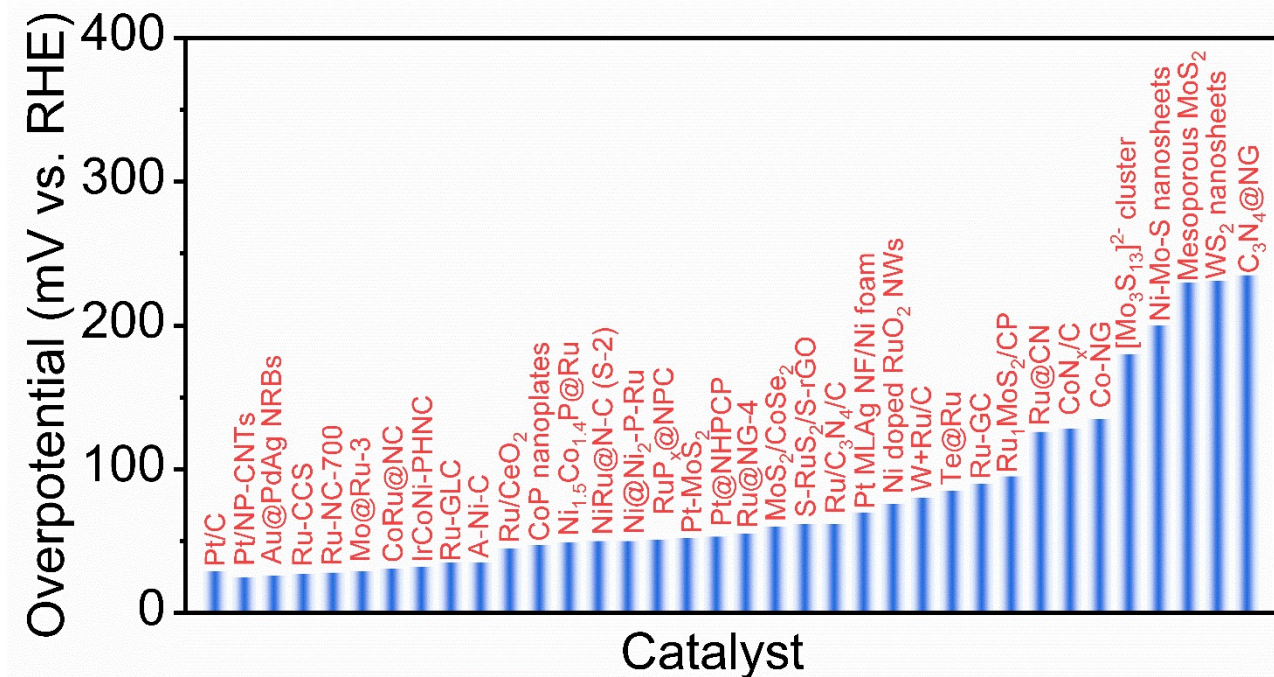

**Figure S7.** Overpotential comparison of recently reported representative HER electrocatalysts in acidic electrolytes.

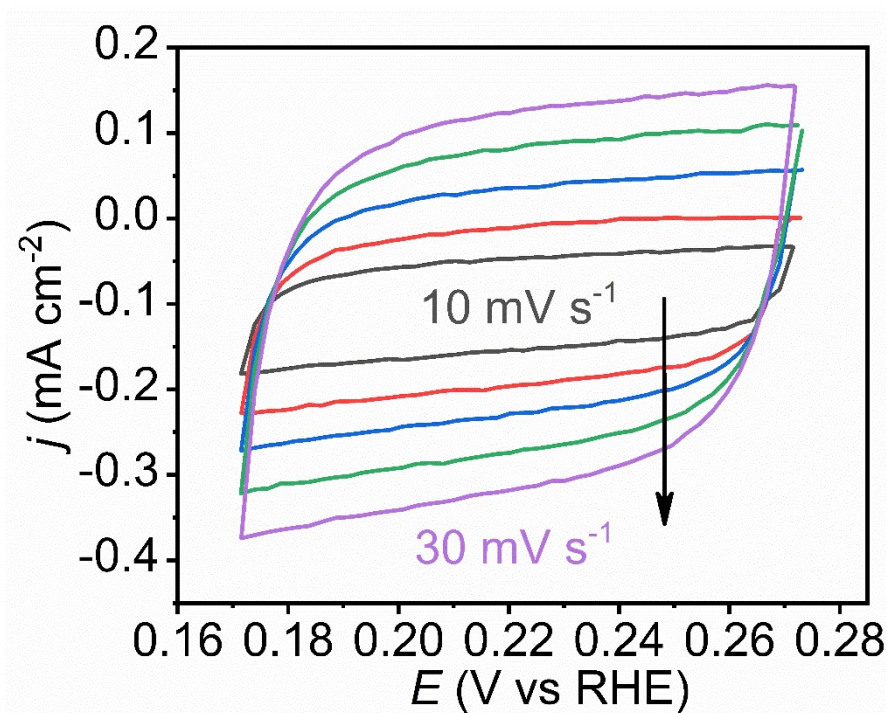

**Figure S8.** CV curves of Pt/NP-CNTs at different scan rates from 10 mV s<sup>-1</sup> to 30 mV s<sup>-1</sup> in the potential range of 0.17 to 0.27 (vs. RHE).

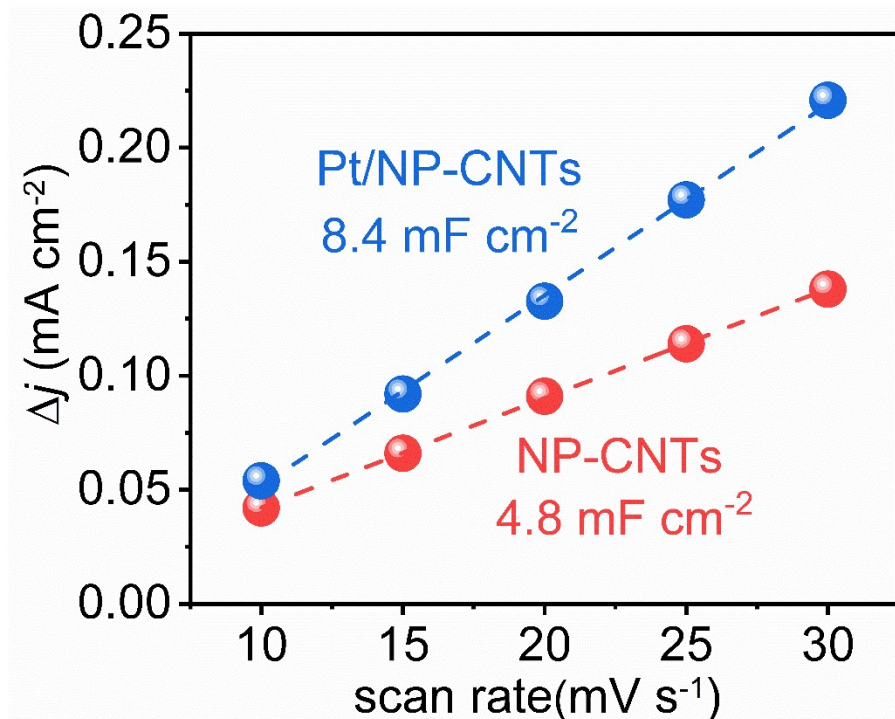

**Figure S9.** The extraction of the  $C_{dl}$  for NP-CNTs and Pt/NP-CNTs.

**Table S1.** The Ni contents in raw CNTs, O-CNTs, N-CNTs, NP-CNTs and Pt/NP-CNTs measured by ICP-AES.

| Sample     | Ni contents (wt%) |
|------------|-------------------|
| Raw CNTs   | 2.93              |
| O-CNTs     | 0.92              |
| N-CNTs     | 0.09              |
| NP-CNTs    | 0.08              |
| Pt/NP-CNTs | 0.08              |

**Table S2.** Summary of recently reported representative HER electrocatalysts in acidic electrolytes.

| No. | Catalysts    | Overpotential at $\eta_{10}$ (mV) | Tafel slope (mV dec <sup>-1</sup> ) | References                          |
|-----|--------------|-----------------------------------|-------------------------------------|-------------------------------------|
| 1   | Pt/C         | 29                                | 29                                  | <b>This work</b>                    |
| 2   | Pt/NP-CNTs   | 25                                | 28                                  | <b>This work</b>                    |
| 3   | Au@PdAg NRBs | 26                                | 30                                  | J. Am. Chem. Soc., 2016, 138, 1414. |

|    |                                          |    |    |                                               |
|----|------------------------------------------|----|----|-----------------------------------------------|
| 4  | Ru-CCS                                   | 27 | 33 | J. Mater. Chem. A, 2018, 6, 2311.             |
| 5  | Ru-NC-700                                | 29 | 28 | Nat. Commun., 2019, 10, 631.                  |
| 6  | Mo@Ru-3                                  | 31 | 36 | J. Mater. Chem. A, 2019, 7, 2780.             |
| 7  | CoRu@NC                                  | 32 | 47 | Nanotechnology, 2018, 29, 225403.             |
| 8  | IrCoNi-PHNC                              | 33 | 32 | Adv. Mater., 2017, 29, 1703798.               |
| 9  | Ru-GLC                                   | 35 | 46 | ACS Appl. Mater. Interfaces, 2016, 8, 35132.  |
| 10 | A-Ni-C                                   | 34 | 41 | Nature Comm., 2016, 7, 10667.                 |
| 11 | Ru/CeO <sub>2</sub>                      | 47 | 41 | ACS Appl. Mater. Interfaces, 2018, 10, 6299.  |
| 12 | CoP nanoplates                           | 48 | 57 | Nat. Mater., 2015, 14, 1245-1251.             |
| 13 | Ni <sub>1.5</sub> Co <sub>1.4</sub> P@Ru | 49 | 49 | Chem. Commun., 2017, 53, 13153.               |
| 14 | NiRu@N-C (S-2)                           | 50 | 36 | J. Mater. Chem. A, 2018, 6, 1376.             |
| 15 | Ni@Ni <sub>2</sub> -P-Ru                 | 51 | 35 | J. Am. Chem. Soc., 2018, 140, 2731.           |
| 16 | RuP <sub>x</sub> @NPC                    | 51 | 46 | ChemSusChem, 2018, 11, 743-752.               |
| 17 | Pt-MoS <sub>2</sub>                      | 53 | 40 | Nat. Commun., 2013, 4, 1444.                  |
| 18 | Pt@NHPCP                                 | 57 | 27 | Nano Energy, 2017, 40, 88-94.                 |
| 19 | Ru@NG-4                                  | 60 | 41 | Sustain. Energy Fuels, 2017, 1, 1028.         |
| 20 | MoS <sub>2</sub> /CoSe <sub>2</sub>      | 68 | 36 | Nat. Commun., 2015, 6, 5982.                  |
| 21 | S-RuS <sub>2</sub> /S-rGO                | 69 | 64 | ACS Appl. Mater. Interfaces, 2018, 10, 34098. |
| 22 | Ru/C <sub>3</sub> N <sub>4</sub> /C      | 70 | -- | J. Am. Chem. Soc., 2016, 138, 16174.          |
| 23 | Pt MLAg NF/Ni foam                       | 70 | 53 | Sci. Adv., 2015, 1, e1400268.                 |
| 24 | Ni doped RuO <sub>2</sub> NWs            | 78 | -- | J. Mater. Chem. A, 2019, 7, 6411.             |
| 25 | W+Ru/C                                   | 85 | 46 | ACS Appl. Mater. Interfaces, 2018, 10, 6354.  |
| 26 | Te@Ru                                    | 86 | 36 | Chem. Commun., 2019, 55, 1490.                |
| 27 | Ru-GC                                    | 90 | 33 | Electrochim. Acta, 2015, 167, 455.            |
| 28 | Ru <sub>1</sub> MoS <sub>2</sub> /CP     | 96 | -- | Nanoscale, 2017, 9, 16616.                    |



---

|    |                                                          |     |      |                                      |
|----|----------------------------------------------------------|-----|------|--------------------------------------|
| 29 | Ru@CN                                                    | 126 | --   | Energy Environ. Sci., 2018, 11, 800. |
| 30 | CoN <sub>x</sub> /C                                      | 133 | 57   | Nat. Commun., 2015, 6, 7992.         |
| 31 | Co-NG                                                    | 147 | 82   | Nat. Commun., 2015, 6, 8668.         |
| 32 | [Mo <sub>3</sub> S <sub>13</sub> ] <sup>2-</sup> cluster | 180 | 40   | Nature Chem., 2014, 6, 248.          |
| 33 | Ni-Mo-S<br>nanosheets                                    | 200 | 85.3 | Sci. Adv., 2015, 1, e1500259.        |
| 34 | Mesoporous MoS <sub>2</sub>                              | 233 | 50   | Nat. Mater., 2012, 11, 963.          |
| 35 | WS <sub>2</sub> nanosheets                               | 234 | 55   | Nat. Mater., 2013, 12, 850.          |
| 36 | C <sub>3</sub> N <sub>4</sub> @NG                        | 240 | 52   | Nat. Commun., 2014, 5, 3783.         |

---
